# Supplementary material
Source: PubMed Central journal article supplement (PMC7762719)
Supplement: mmc1.pdf [file mmc1.pdf]

1 **Supplementary material**

2

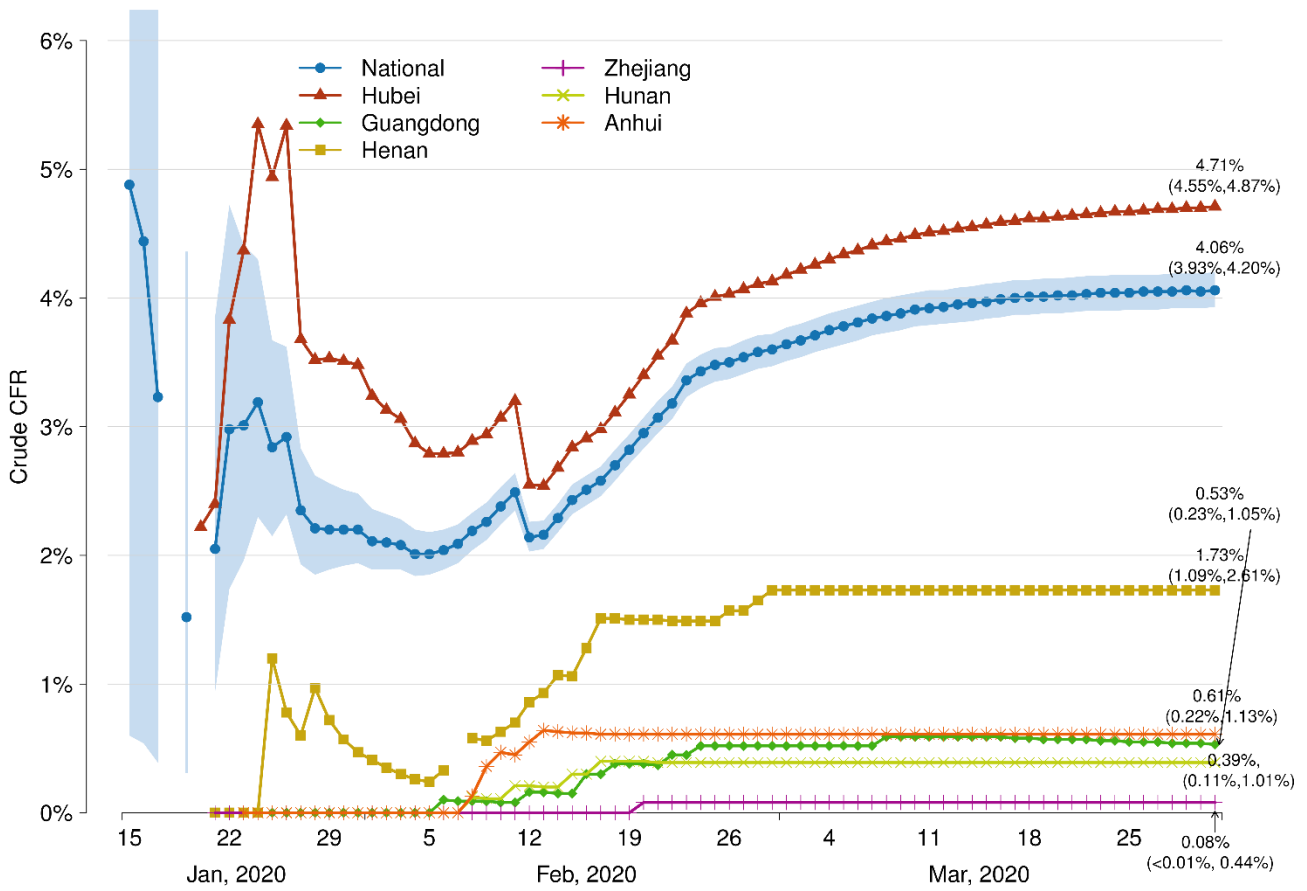

3

4 **Figure S1. Crude case-fatality ratios (cCFRs) calculated by different dates in the six provinces**  
5 **with the highest total caseloads.**

6 By each date, the proportion of cumulative deaths among cumulative confirmed cases is calculated.  
7 Trends of cCFRs are presented in solid lines by province. Numbers at the end of each curve represent  
8 the cCFRs by 31 March 2020, with 95% confidence intervals (CIs) showing in brackets. For clarity  
9 of presentation, only the time-varying 95% CIs for national cCFRs are shown.
